# Supplementary material for: IGF-1 facilitates extinction of conditioned fear
Source: eLife. 2021 Apr 1;10:e67267. doi: 10.7554/eLife.67267 (PMC8043742; doi:10.7554/eLife.67267)
Supplement: Figure 1—figure supplement 1—source data 1. — IGF-1 has no effect on fAHP and fIAHP. [file elife-67267-fig1-figsupp1-data1.xlsx]

## Sheet: Figure 1-S1B
	fAHP
	ACSF	IGF-1	NVP-AEW	NVP+IGF-1
	-0.96	-0.81	-0.72	-1.24
	-1.85	-1.54	-0.39	-0.76
	-2.46	-1.61	-0.29	-0.6
	-0.97	-0.97	-1.33	-1.38
	-1.13	-1.67	-1.62	-2.78
	-1.44	-1.81
	-2.27	-2.12

## Sheet: Figure 1-S1D
	fIAHP
	ACSF	IGF-1	NVP-AEW	NVP+IGF-1
	89.18	72.32	52.25	40.65
	98.39	80.53	115.67	122.48
	103.23	105.71	198.75	198.22
	247.65	253.84	35.5	55.16
	55.41	56.1	119.24	108.82
	95.61	147.38
	177.05	56.1
	43.83	219.27
	34.23	28.38
