# Supplementary material for: IGF-1 facilitates extinction of conditioned fear
Source: eLife. 2021 Apr 1;10:e67267. doi: 10.7554/eLife.67267 (PMC8043742; doi:10.7554/eLife.67267)
Supplement: Figure 1—figure supplement 2—source data 1. [file elife-67267-fig1-figsupp2-data1.xlsx]

## Sheet: Figure 1-S2A
	AP amplitude
	ACSF	IGF-1
	86.64	85.8
	72.46	82.23
	72.21	71.23
	70.98	68.27
	96.38	67.92
	81.78	79.68
	78.5	69.91
	88.23	96.62
	83.85	69.23

## Sheet: Figure 1-S2B
	AP threshold
	ACSF	IGF-1
	-41.43	-39.68
	-37.2	-39.63
	-43.36	-49.64
	-38.07	-42.34
	-40.76	-42.22
	-40.01	-36.16
	-42.09	-40.84
	-36.01	-33.62
	-37.91	-35.69

## Sheet: Figure 1-S2C
	AP half-width
	ACSF	IGF-1
	3.63	3.53
	3.32	2.77
	3.15	3.48
	3.86	3.03
	2.17	3.82
	4.3	5.65
	4.5	4.02
	4.13	3.6
	5.37	8.21

## Sheet: Figure 1-S2D
	AP time to rise slope
	ACSF	IGF-1
	1.17	1.17
	0.86	1.25
	0.86	1.03
	1.02	1.03
	1.21	1.19
	1.39	1.29
	1.22	1.04
	1.07	1.26
	1.17	1.12

## Sheet: Figure 1-S2E
	AP rise slope
	ACSF	IGF-1
	124.66	103.96
	54.37	76.79
	61.3	73.83
	69.8	76.26
	161.16	49.87
	94.62	64.54
	107.5	65.91
	109.37	133.26
	99.76	50.68

## Sheet: Figure 1-S2F
	AP time to decay slope
	ACSF	IGF-1
	1.04	1.052
	1.54	1.27
	2.46	1.44
	1	0.92
	0.87	1.37
	1.25	1.27
	1.17	1.32
	1.06	1.02
	1.7	1.85

## Sheet: Figure 1-S2G
	AP decay slope
	ACSF	IGF-1
	-25.1	-26.67
	-15.88	-24.32
	-12.67	-17.66
	-21.64	-23.06
	-40.17	-16.57
	-41.45	-37.5
	-39.37	-36.93
	-44.67	-48.46
	-40.56	-35.26

## Sheet: Figure 1-S2H
	Input resistance
	ACSF	IGF-1
	95	111.67
	122	145.6
	150	190.33
	109.05	115.15
	109.67	150.96
	133.06	172.42
	106.2	165.1
	168.15	171.2
	104.98	177
	78.12	117.8
	77.88	111.82
	60.12	94.3
