# Supplementary material for: IGF-1 facilitates extinction of conditioned fear
Source: eLife. 2021 Apr 1;10:e67267. doi: 10.7554/eLife.67267 (PMC8043742; doi:10.7554/eLife.67267)
Supplement: Figure 1—source data 1. [file elife-67267-fig1-data1.xlsx]

## Sheet: Figure 1B
	mAHP
	ACSF	IGF-1	NVP-AEW	NVP+IGF-1
	-3.33	-1.12	-3.35	-6.75
	-5.23	-1.01	-4.11	-5.49
	-3.38	-1.55	-5.21	-5.67
	-7.17	-0.92	-6.56	-6.05
	-6.15	-2.77	-2.81	-5.49
	-6.93	-1.8	-6.8	-5.82
	-1.53	-1.08
	-9.66	-1.76
	-5.8	-0.82

## Sheet: Figure 1C
	sAHP
	ACSF	IGF-1	NVP-AEW	NVP+IGF-1
	-1.382	-0.875333	-2.60818	-4.66733
	-2.22933	-0.676	-2.54733	-3.296
	-1.91933	-0.854067	-3.55733	-3.338
	-4.18133	-0.469333	-4.026	-4.30667
	-3.48467	-1.308	-2.38867	-3.45143
	-2.878	-1.312	-4.17933	-3.56333
	-0.880667	-0.806667
	-6.482	-1.13733
	-3.17333	-0.501

## Sheet: Figure 1E
	Current inyection	ACSF		IGF-1
	pA	Mean	SEM	Mean	SEM
	25	0.0892857	0.0860379	0	0
	50	0.972143	0.306448	2.111	0.853547
	75	2.63857	0.686238	5.445	1.03248
	100	5.20786	0.873494	9.403	1.00043
	125	7.39071	0.902305	12.333	1.13567
	150	9.88214	0.894925	14.861	1.23269
	175	11.825	0.931904	17.3567	1.62917
	200	10.8115	1.37484	18.09	1.38539
