# Supplementary material for: IGF-1 facilitates extinction of conditioned fear
Source: eLife. 2021 Apr 1;10:e67267. doi: 10.7554/eLife.67267 (PMC8043742; doi:10.7554/eLife.67267)
Supplement: Figure 2—figure supplement 1—source data 1. — Time course of mIAHP and sIAHP. [file elife-67267-fig2-figsupp1-data1.xlsx]

## Sheet: Figure 2-S1A
	Time	mIAHP		sIAHP
	minute	Mean	SEM	Mean	SEM
	-9	102.56	7.68	98.05	4.45
	-6	101.35	2.26	103.39	1.43
	-3	97.28	2.32	99.82	1.21
	0	99.2	1.72	99.21	1.33
	3	98.06	5.11	99.36	4.14
	6	99.08	2.17	97.87	3.28
	9	102.21	3.02	97.91	4.28
	12	98.36	3.15	94.01	5.84
	15	97.19	3.43	94.58	7.5
	18	102.63	4.75	95.7	8.78
	21	102.53	6.46	95.5	9.88
	24	101.16	6.96	94.25	9.06
	27	102.74	7.84	90.89	9.39
	30	95.84	5.18	92.5	7.83
	33	93.78	7.2	94.55	8.59
	36	98.84	8.23	97.42	7.18
	39	99.91	6.03	96.62	8.01
	42	98.64	6.86	102.8	9.67
	45	98.27	8.11	100	5

## Sheet: Figure 2-S1B
	Time	mIAHP		mIAHP no stim 20 min
	minute	Mean	SEM	Mean	SEM
	-9	101.57	1.79415	102.883	3.22616
	-6	100.372	2.46013	97.3821	2.57265
	-3	98.4432	1.46472	98.3445	2.92712
	3	96.9688	2.04199
	6	85.8772	5.48634
	9	78.5104	5.94768
	12	76.9757	6.2976
	15	68.4915	6.52102
	18	66.7818	6.36001
	21	63.1717	7.20338	94.7821	8.36649
	24	61.7655	8.56019	82.7266	6.90632
	27	67.631	7.98031	73.6375	7.69554
	30	66.1518	13.8868	67.1083	6.98129
	33	66.2741	15.0602	61.9499	7.11727
	36	64.8207	13.3867	58.2089	6.10328
	39	62.9326	15.4667	55.2742	7.09325
	42	62.4448	12.3923	52.3828	7.40921
	45	53.6604	8.93381	50.9255	7.32773
	48	54.5008	8.47511	48.1904	7.84818
	51	51.6664	8.26225	44.8611	8.73873
	54	49.8354	10.6778	41.9023	9.04899
	57	40.0729	5.45767	41.9965	13.9145
	60	30.7322	7.17545	39.3921	13.9646

## Sheet: Figure 2-S1C
	Time	sIAHP		sIAHP no stim 20 min
	minute	Mean	SEM	Mean	SEM
	-9	109.084	0.935531	105.143	6.09053
	-6	100.277	0.981769	103.686	2.67365
	-3	98.7879	2.03001	97.5707	6.59872
	3	88.7334	7.90656
	6	79.2808	7.98769
	9	72.0086	8.53721
	12	66.0563	10.7465
	15	62.2899	12.0946
	18	57.7376	10.9857
	21	51.1237	10.8017	99.0634	10.7623
	24	54.1021	7.75013	82.1151	10.8479
	27	51.4889	8.88663	71.1984	12.0699
	30	44.7765	9.90837	73.7202	11.5438
	33	46.0369	9.67904	64.3806	13.0173
	36	33.8183	4.1638	57.4985	10.8113
	39	32.8863	2.4692	42.4592	7.92195
	42	43.1046	9.90093	38.5412	6.34207
	45	47.9338	9.40148	31.6394	7.17728
	48	40.2751	9.20422	26.2626	5.59607
	51	34.3285	5.97587	30.4877	3.07425
	54	31.3738	0.972713	30.0116	9.93515
	57	30.3274	7.02682	34.3436	4.21313
	60	30.3274	7.02682	35.8371	8.26746
