# Supplementary material for: IGF-1 facilitates extinction of conditioned fear
Source: eLife. 2021 Apr 1;10:e67267. doi: 10.7554/eLife.67267 (PMC8043742; doi:10.7554/eLife.67267)
Supplement: Figure 2—source data 1. — IGF-1 reduces mIAHP and sIAHP in IL-L5PNs. [file elife-67267-fig2-data1.xlsx]

## Sheet: Figure 2B
	mIAHP
		Mean	SEM
	ACSF	100	13.81
	IGF-1	67.21	12.89
	NVP	100	19.29
	NVP+IGF-1	76.63	21.05

## Sheet: Figure 2C
	Time	ACSF		IGF-1
	minute	Mean	SEM	Mean	SEM
	-12	102.09	1.83	101.54	4.2
	-9	100.72	1.62	100.61	1.01
	-6	100.03	1.51	99.29	1.2
	-3	97.81	1.91	99.3	2
	3	91.58	4.19	111.72	9.24
	6	88.98	4.75	106.98	7.39
	9	81.28	3.06	99.17	5.59
	12	73.64	2.88	99.66	6.85
	15	71.41	3.6	96.11	8.19
	18	67.39	4.3	96.37	13.96
	21	73.03	4.52	101.97	15.39
	24	69.17	3.88	105.47	18.19
	27	68.85	4.26	104.96	15.6
	30	63.95	5.67	110.5	10.1
	33	64.4	4.62	112.99	16.87
	36	62.69	5.72	96.42	16.4
	39	57.03	7.58	107.05	2.35

## Sheet: Figure 2D
	sIAHP
		Mean	SEM
	ACSF	100	16.39
	IGF-1	60.48	10.94
	NVP	100	25.12
	NVP+IGF-1	70.73	23.58

## Sheet: Figure 2E
	Time	ACSF		IGF-1
	minute	Mean	SEM	Mean	SEM
	-12	104.93	0.93	97.22	7.04
	-9	102.09	2.2	99.42	3.21
	-6	97.42	3.51	98.22	2.93
	-3	97.75	2.58	103.55	3.73
	3	85.59	3.84	118.84	14.93
	6	83.52	5.43	113.37	11.22
	9	73.87	4.6	98.5	10.18
	12	67.82	4.63	93.31	6.76
	15	64.35	4.36	105.67	16.98
	18	60.19	4.45	91.89	6.81
	21	59.98	4.73	100.31	8.78
	24	59.88	4.32	107.78	15.01
	27	54.26	5.42	91.42	9.02
	30	52.15	5.45	111.24	13.18
	33	50.06	5.73	114.58	12.4
	36	49.37	5.71	108.83	6.95
	39	51.21	9.87	93.36	14.09

## Sheet: Figure 2G
	mIAHP in GDPßs			sIAHP in GDPßs
	ACSF	IGF-1		ACSF	IGF-1
	108.11	66.16		131.68	77.5
	111.54	70.23		154.86	90.21
	103.39	23.9		40.8	13.7
	112.42	38.02		101.38	28.75
	128.71	75.5		141.49	86.4
	75.41	103.11		100.89	92.93
	50.38	93.82		38.31	26.42
	86.7	113.41		90.59	99.5
