# Supplementary material for: IGF-1 facilitates extinction of conditioned fear
Source: eLife. 2021 Apr 1;10:e67267. doi: 10.7554/eLife.67267 (PMC8043742; doi:10.7554/eLife.67267)
Supplement: Figure 3—figure supplement 1—source data 1. — The protocol of stimulation does not induce plasticity. [file elife-67267-fig3-figsupp1-data1.xlsx]

## Sheet: Figure 3-S1A
	% PSP
	Time	ACSF
	minute	Mean	SEM
	-5	97.4607	3.46223
	-4	94.6028	3.51854
	-3	97.3533	3.75324
	-2	98.0241	5.98809
	-1	103.143	5.00176
	21	106.337	6
	22	102.19	7.2601
	23	103.384	2.4758
	24	96.9651	5.12036
	25	90.1366	11.2651
	26	93.1593	4.25165
	27	106.409	5.00665
	28	93.493	4.97666
	29	88.1149	7.186
	30	93.7206	3.14854
	31	93.7554	3.82825
	32	94.436	6.86958
	33	97.1617	5.0049
	34	89.7047	4.96537
	35	88.7267	4.07844
	36	91.3214	4.69768
	37	98.2087	6.04007
	38	95.3074	7.89268
	39	89.7781	7.85779
	40	96.6105	9.19329
	41	93.5274	6.75528
	42	92.0183	6.09533
	43	91.1367	6.99373
	44	89.876	7.11472
	45	100.971	4.06003
	46	102.1	7.72525
	47	96.1679	10.9238
	48	99.452	8.08144
	49	100.058	10.0956
	50	106	9.74971

## Sheet: Figure 3-S1B
	# Action Potentials
	0 min	5 min	10 min	15 min
	1	0	3	1
	10	8	12	14
	1	1	2	1
	13	4	3	7
	1	1	1	1
