# Supplementary material for: IGF-1 facilitates extinction of conditioned fear
Source: eLife. 2021 Apr 1;10:e67267. doi: 10.7554/eLife.67267 (PMC8043742; doi:10.7554/eLife.67267)
Supplement: Figure 3—figure supplement 2—source data 1. — The application of IGF-1 is sufficient to induce plasticity. [file elife-67267-fig3-figsupp2-data1.xlsx]

## Sheet: Figure 3-S2A
	% PSP
	Time	ACSF
	minute	Mean	SEM
	-5	96.402	1.37746
	-4	97.0022	1.09003
	-3	106.628	3.14021
	-2	100.42	0.775993
	-1	99.6803	2.95337
	16	112.427	9.32888
	17	134.259	10.7754
	18	111.679	11.3685
	19	117.836	9.53987
	20	116.428	5.10094
	21	126.691	9.77434
	22	124.69	5.74643
	23	130.188	7.1304
	24	125.002	7.15833
	25	119.909	15.0691
	26	120.572	11.2968
	27	126.664	13.5206
	28	114.197	12.2253
	29	118.159	6.2751
	30	125.926	7.21117
	31	136.46	8.03055
	32	124.668	8.97842
	33	145.592	12.9237
	34	135.468	10.4565
	35	155.446	10.6479
	36	150.821	16.2016
	37	159.94	8.26473
	38	132.085	13.1678
	39	123.743	8.67733
	40	132.838	11.0404
	41	127.043	16.6123
	42	139.364	19.609
	43	144.184	21.7266
	44	152.386	15.638
	45	147.875	17.1389
	46	154.619	11.9525
	47	144.408	9.03881
	48	134.571	6.19819
	49	133.697	5.52836
	50	141.765	8.95398
	51	146.692	10.8742
	52	152.538	11.3637
	53	157.122	12.202
	54	146.873	7.46597
	55	154.157	16.7759
	56	144.213	7.54296
	57	152.847	6.6655
	58	136.923	7.78886
	59	132.86	5.03324
	60	139.418	6.89726

## Sheet: Figure 3-S2B
	# Action Potentials
	ACSF	5 min	10 min
	12	26	33
	1	3	15
	5	20	27
	9	28	40
