# Supplementary material for: IGF-1 facilitates extinction of conditioned fear
Source: eLife. 2021 Apr 1;10:e67267. doi: 10.7554/eLife.67267 (PMC8043742; doi:10.7554/eLife.67267)
Supplement: Figure 3—source data 1. — IGF-1 induces long-term potentiation of the synaptic transmission. [file elife-67267-fig3-data1.xlsx]

## Sheet: Figure 3A
	% EPSC
	Time	ACSF		NVP
	minute	Mean	SEM	Mean	SEM
	-5	102.34	2.86061	99.3836	3.65004
	-4	100.38	2.53105	94.3255	0.331186
	-3	98.7756	1.72109	101.825	3.4724
	-2	100.444	3.35661	103.271	1.6102
	-1	92.8849	2.45085	99.3945	4.30642
	1	100.286	5.43293	102.849	3.98777
	2	93.5819	5.07612	99.2178	5.74054
	3	88.6728	4.29912	94.4412	6.29469
	4	85.6473	7.16595	103.695	7.83743
	5	85.6343	8.45339	102.279	10.1677
	6	82.8131	9.53582	100.378	9.93858
	7	77.9092	8.51389	97.7942	8.07873
	8	79.9832	5.96741	93.0837	7.13293
	9	74.0464	4.59581	90.8989	5.70024
	10	73.0751	8.90482	96.5104	7.45704
	11	68.8511	9.1745	89.6611	8.72547
	12	67.6605	4.79138	95.2838	11.5788
	13	70.2201	6.03255	92.6475	11.5313
	14	69.772	6.59747	92.9366	7.50846
	15	70.3286	5.4935	85.8834	6.51338
	16	68.6947	5.0523	91.5209	11.4394
	17	75.6642	6.46101	90.7581	6.34322
	18	75.858	8.15517	94.3716	8.76887
	19	70.6021	5.31025	94.8393	12.0099
	20	71.6687	6.86833	99.5215	8.85547
	21	73.4383	8.53484	103.8	9.86188
	22	74.7985	6.74005	103.061	10.1613
	23	75.3597	10.8289	100.178	10.5648
	24	78.0151	6.17732	102.03	7.34367
	25	77.4577	2.92277	109.887	7.867
	26	81.47	7.42026	107.201	7.45638
	27	80.1952	5.58874	107.578	7.84685
	28	83.1463	8.66314	109.258	9.49043
	29	81.9248	8.6245	103.656	7.05661
	30	83.7148	7.77789	99.6692	8.5352
	31	79.7693	6.04064	99.46	6.09849
	32	75.9192	7.54181	109.595	13.5265
	33	72.9648	10.6608	102.276	8.08081
	34	71.5452	11.1127	98.7467	2.36174
	35	70.7011	16.9511	94.468	0.643931
	36	78.417	7.43728	94.616	2.86399
	37	78.8192	7.94133	90.1574	0.0362551
	38	80.657	7.72535	97.4605	9.12548
	39	72.0973	18.5891	93.4864	14.7098
	40	72.4948	13.6344	94.4574	17.6625
	41	78.3162	14.747	96.9149	11.6535
	42	69.3377	21.0387	94.5881	0.430352
	43	68.1612	21.5594	104.796	1.3247
	44	65.1315	15.459	102.249	9.11554
	45	65.4021	20.308	90.7493	0.281631
	46	66.2684	14.4094	97.7643	0.252239
	47	67.5674	17.9031	98.4007	11.7801
	48	64.7429	20.2165	102.37	1.65665
	49	70.5234	12.1834	101.135	13.5608
	50	73.931	16.4086	90.181	3.92026

## Sheet: Figure 3B
	PPR (EPSC)
	ACSF	IGF-1
	1.24988	1.51684
	1.05939	1.32379
	0.929557	1.21191
	1.11353	1.4224
	1.26056	1.34215

## Sheet: Figure 3C
	CV (EPSC)
	1/CVr2	Mr
	0.548857	0.324035
	0.924018	1.14783
	0.745225	1.0967
	0.752407	0.770273
	0.511729	0.689749

## Sheet: Figure 3D
	% EPSC
	Time	ACSF
	minute	Mean	SEM
	-5	103.753	2.63461
	-4	102.77	4.31895
	-3	97.1446	3.95902
	-2	97.5093	1.9745
	-1	98.1482	4.26601
	16	75.4196	9.74662
	17	84.6889	6.73465
	18	85.9011	8.89645
	19	91.5292	9.99976
	20	96.5057	9.37154
	21	91.6227	10.1349
	22	97.3816	11.488
	23	100.285	11.3669
	24	92.0518	12.0338
	25	89.8479	15.3869
	26	88.0297	17.9733
	27	87.4317	15.074
	28	86.3575	15.7258
	29	83.9323	16.8088
	30	82.3862	17.9224
	31	79.934	17.7922
	32	82.6883	17.4717
	33	74.8163	13.6203
	34	79.7716	12.2746
	35	81.4732	10.3039
	36	78.658	11.3556
	37	75.3913	9.12063
	38	76.8914	11.9132
	39	83.6437	13.1064
	40	82.4372	14.9665
	41	80.5533	11.7976
	42	86.0411	9.08926
	43	78.4885	8.7657
	44	74.4043	9.06503
	45	69.3702	10.2631
	46	68.2868	10.2814
	47	67.351	8.90518
	48	71.0747	11.0829
	49	68.4391	14.2388
	50	67.5901	15.4038

## Sheet: Figure 3E
	% IPSC
	Time	ACSF		NVP
	minute	Mean	SEM	Mean	SEM
	-5	93.9332	0.217273	102.645	3.49522
	-4	100.436	3.94155	103.061	1.6108
	-3	97.0945	2.28141	96.5227	3.5195
	-2	103.308	3.85553	93.2179	2.92923
	-1	101.184	4.89472	98.5773	4.75637
	1	101.287	3.25509	95.709	8.15109
	2	91.4706	5.14669	100.172	8.16223
	3	91.6133	6.98484	95.3633	6.85641
	4	101.883	6.08786	95.4851	4.74147
	5	94.3323	6.31226	101.9	9.5264
	6	91.6141	6.22613	100.87	6.35897
	7	94.5278	4.57574	95.2781	6.38546
	8	94.8879	3.02053	102.687	6.09353
	9	92.3073	5.65404	104.009	5.61338
	10	91.9952	7.50219	106.986	7.10106
	11	89.0007	8.75253	102.978	6.70081
	12	87.1659	8.61091	105.871	6.98502
	13	82.9397	10.3388	103.418	6.15339
	14	84.8349	9.06091	101.918	5.83486
	15	85.211	7.74253	97.8755	7.189
	16	84.7937	6.91308	100.318	8.6638
	17	83.7802	7.17592	97.2238	7.80073
	18	81.6068	8.03454	93.2013	7.56648
	19	77.6935	6.57169	101.269	4.8499
	20	73.3097	7.08106	98.3823	5.48779
	21	65.4563	8.66196	103.33	6.77358
	22	67.9737	9.64674	100.761	7.62772
	23	68.2914	10.3046	101.934	11.1593
	24	68.1632	10.9391	104	10.7887
	25	68.0358	11.9522	102.246	14.5777
	26	72.0641	12.9628	102.907	6.82615
	27	71.8147	12.8822	107.039	6.9094
	28	70.4809	12.7504	114.35	10.9639
	29	69.5631	12.7036	101.062	7.93518
	30	75.6342	11.6541	100.828	7.38031
	31	68.916	10.8326	106.9	9.0747
	32	66.317	10.6222	94.0111	3.48524
	33	69.5473	11.5124	107.382	4.30473
	34	71.6281	11.6271	114.848	3.42482
	35	73.4913	13.3615	104.164	3.59275
	36	70.633	12.4789	95.0708	3.46397
	37	71.8929	12.6482	96.7567	8.19638
	38	70.7871	11.5852	104.67	8.27191
	39	68.772	11.8299	99.7701	8.82018
	40	75.1619	13.5758	93.075	5.78802
	41	73.5969	13.0778	99.6017	1.60604
	42	76.8135	13.35	93.8809	9.52403
	43	75.6935	12.4852	86.3109	8.2837
	44	72.9492	2.96339	90.4556	7.19333
	45	74.2048	4.45551	91.1354	4.09474
	46	70.5962	6.39943	88.4526	1.72831
	47	73.0841	5.64514	93.536	1.05629
	48	71.8275	5.7923	98.5207	11.0206
	49	74.7518	4.0779	96.9204	8.42965
	50	71.9022	2.05084	91.8019	9.19516

## Sheet: Figure 3F
	PPR (IPSC)
	ACSF	IGF-1
	1.01679	1.5657
	1.41355	1.38914
	0.987316	1.12881
	1.18694	1.4472
	1.09039	1.20778
	1.11827	1.33089

## Sheet: Figure 3G
	CV (IPSC)
	1/CVr2	Mr
	0.324035	0.548857
	1.14783	0.924018
	1.0967	0.745225
	0.770273	0.752407
	0.689749	0.511729

## Sheet: Figure 3H
	% IPSC
	Time	ACSF
	minute	Mean	SEM
	-5	100.755	2.97785
	-4	102.235	2.23774
	-3	97.1697	1.81134
	-2	97.8233	4.85519
	-1	98.4373	2.03378
	16	62.9682	10.1444
	17	61.6116	10.2901
	18	59.2479	12.0053
	19	55.7133	12.2157
	20	52.9024	10.504
	21	50.539	9.63745
	22	52.7248	10.6065
	23	47.5791	7.55771
	24	49.7314	11.3187
	25	43.5003	10.6082
	26	45.9471	9.53259
	27	45.0331	10.4886
	28	41.7739	9.98843
	29	42.7239	9.28616
	30	44.2893	8.35253
	31	41.7531	7.81054
	32	44.5452	10.2725
	33	47.1995	12.1138
	34	44.7318	11.1119
	35	51.6683	11.371
	36	40.5431	8.42289
	37	39.8942	8.75929
	38	43.6967	9.04255
	39	37.5597	8.22473
	40	43.5667	9.25503
	41	44.1859	11.4002
	42	38.2245	8.85779
	43	37.1044	9.06828
	44	39.1554	11.4296
	45	43.4354	10.5376
	46	40.8936	13.609
	47	40.9279	12.009
	48	39.9928	10.1421
	49	44.1308	13.4353
	50	41.9937	12.9505

## Sheet: Figure 3I
	% PSP
	Time	ACSF
	minute	Mean	SEM
	-5	97.35	1.72
	-4	98.62	2.8
	-3	102.53	2.02
	-2	97.86	2.23
	-1	103.49	2.8
	21	124.174	6.2868
	22	127.793	8.75562
	23	128.298	3.43895
	24	122.839	6.90865
	25	132.233	8.11328
	26	130.419	5.78429
	27	129.235	6.21539
	28	125.332	5.5735
	29	124.259	4.56806
	30	128.071	3.23215
	31	122.414	3.88068
	32	128.938	4.76802
	33	124.689	4.81951
	34	127.723	4.17748
	35	129.858	4.56253
	36	133.689	5.95963
	37	133.561	4.08186
	38	131.669	4.86406
	39	133.239	6.10729
	40	125.69	5.32378
	41	134.11	7.40276
	42	130.119	4.27254
	43	130.618	3.42927
	44	126.466	4.15037
	45	131	7.57716
	46	117.844	3.39821
	47	125.07	4.5357
	48	125.275	5.50454
	49	128.583	5.78566
	50	125.689	3.79278

## Sheet: Figure 3K
	PSP amplitude			PSP area			Tau ON			Tau OFF
	ACSF	IGF-1		ACSF	IGF-1		ACSF	IGF-1		ACSF	IGF-1
	7.73493	10.4791		647.159	704.718		4.91166	4.84767		96.5389	66.222
	6.80844	9.19824		584.119	714.26		2.48773	3.29065		75.8792	81.7286
	6.6264	7.35834		397.132	406.974		4.91206	6.77714		57.2985	43.7287
	4.05851	4.85679		210.911	224.172		4.47786	4.64874		50.4283	44.5388
	3.8807	4.23775		201.04	221.173		5.72722	5.19793		55.1377	46.92
	4.56917	7.43241		253.107	395.554		4.12243	4.07426		51.9385	46.7279

[truncated: 2 more sheets: Figure 3M, Figure 3N]
