# Supplementary material for: IGF-1 facilitates extinction of conditioned fear
Source: eLife. 2021 Apr 1;10:e67267. doi: 10.7554/eLife.67267 (PMC8043742; doi:10.7554/eLife.67267)
Supplement: Figure 4—figure supplement 1—source data 1. — Protocol of behavior. [file elife-67267-fig4-figsupp1-data1.xlsx]

## Sheet: Figure 4-S1B
	Habituation						0	78.3333	0	10	89.6667	50	66.6667	86.6667	37.6	60.6667	81.1667	26.6		48.9472	33.5364	9.68113
		conditioned group		extincted group			4	84	2	87.3333	40.3333	89	57	50	50	45.8333	76.6667	19.0333		50.4333	30.6273	8.84135
	Session	Mean	SEM	Mean	SEM		0	0	3	87.6667	88.6667	74.6667	3.33333	53.5333	53.3333	80.6333	63.3333	47.1		46.2722	35.5356	10.2582
	1	0.32381	0.349754	0.361111	0.25112		3.66667	50	5.33333	60	11	54	72.3333	10.1333	0	66.9	38.7	52.5667		35.3861	27.3431	7.89328
	2	8.31905	8.9856	4.02222	2.2842		46.6667	61.6667	38	23.3333	16.3333	4	80	46.5667	55.0333	14.2667	56.6667	0		36.8778	25.125	7.25295
	3	2.17619	1.53974	9.51111	4.61101															#DIV/0!	#DIV/0!	#DIV/0!
	4	0.2	0.182574	0.141667	0.141667															#DIV/0!	#DIV/0!	#DIV/0!
	5	1.83333	0.76715	0.25	0.204124															#DIV/0!	#DIV/0!	#DIV/0!
	6	8.42667	3.50607	8.20833	6.43423															#DIV/0!	#DIV/0!	#DIV/0!
																				#DIV/0!	#DIV/0!	#DIV/0!
																				#DIV/0!	#DIV/0!	#DIV/0!
	Conditioning																			#DIV/0!	#DIV/0!	#DIV/0!
		conditioned group		extincted group																#DIV/0!	#DIV/0!	#DIV/0!
	Session	Mean	SEM	Mean	SEM															#DIV/0!	#DIV/0!	#DIV/0!
	1	21.3571	6.33021	10.0485	4.68664															#DIV/0!	#DIV/0!	#DIV/0!
	2	75.3571	4.08642	73.5545	7.12587															#DIV/0!	#DIV/0!	#DIV/0!
	3	74.4	3.8805	77.5424	5.86408															#DIV/0!	#DIV/0!	#DIV/0!
																				#DIV/0!	#DIV/0!	#DIV/0!
																				#DIV/0!	#DIV/0!	#DIV/0!
	Extinction																			#DIV/0!	#DIV/0!	#DIV/0!
		conditioned group		extincted group
	Session	Mean	SEM	Mean	SEM
	1	-	-	74.7424	8.44003
	2	-	-	88.5879	6.7018
	3	-	-	88.1212	7.15618
	4	-	-	92.2879	2.65338
	5	-	-	78.8212	10.6749
	6	-	-	67.7121	11.6248
	7	-	-	67.3606	10.2605
	8	-	-	59.3758	10.9432
	9	-	-	66.6667	11.6914
	10	-	-	68.6545	10.5889
	11	-	-	67.2485	9.9086
	12	-	-	65.2727	9.37006
	13	-	-	39.7939	10.1857
	14	-	-	34.8455	10.7139
	15	-	-	23.5364	9.267
	16	-	-	26.4303	9.58569
	17	-	-	27.3848	10.5554
	18	-	-	25.497	9.1633
	19	-	-	17.8364	7.65884
	20	-	-	11.9394	6.17843
	Test
		conditioned group		extincted group
	Session	Mean	SEM	Mean	SEM
	1	77.3333	4.72582	48.9472	14.1298
	2	90.4286	4.72733	50.4333	14.5588
	3	95	1.44749	46.2722	13.3576
	4	93	1.49779	35.3861	10.2151
	5	91.9048	3.15869	36.8778	10.6457
