# Supplementary material for: IGF-1 facilitates extinction of conditioned fear
Source: eLife. 2021 Apr 1;10:e67267. doi: 10.7554/eLife.67267 (PMC8043742; doi:10.7554/eLife.67267)
Supplement: Figure 4—figure supplement 2—source data 1. — AHPs of the L5PN of the IL recorded from animals after fear extinction. [file elife-67267-fig4-figsupp2-data1.xlsx]

## Sheet: Figure 4-S2A
	fAHP
	NAIVE	EXT	Ext-Saline	Ext-IGF-1	Ext-NVP+IGF-1
	-7.79571	-7.515	-5.365	-5.35444	-3.156
	-9.15429	-3.655	-6.49	-2.11333	-6.34222
	-7.1375	-1.502	-4.84875	-2.94444	-7.16667
	-7.68	-1.9475	-3.71222	-7.57111	-5.55
	-5.17	-5.7525	-3.05333	-3.21	-7.1
	-7.4925	-4.07	-4.88889	-4.626	-6.7625
	-4.698		-4.80111	-5.606	-4.825
	-7.59		-3.09778		-7.695
	-6.99286		-2.83667
	-9.96667		-7.79125

## Sheet: Figure 4-S2B
	mAHP
	NAIVE	EXT	Ext-Saline	Ext-IGF-1	Ext-NVP+IGF-1
	-1.58143	-2.398	-1.06	-0.864	-1.29667
	-3.398	-1.326	-0.925	-0.728	-0.345
	-1.535	-0.82	-3.19625	-0.03	-0.385
	-1.296	-0.423333	-1.22286	-0.655	-1.65333
	-1.39213	-2.092	-1.98375	-1.195	-2.0125
	-1.984	-0.423333	-1.42375	-1.85333	-4.85333
	-2.008		-1.0375		-1.7685
	-1.66571		-1.33667		-1.07175
	-3.328		-3.27538		-1.1635
	-5.23267		-3.24538		-2.40667
	-3.382		-2.55615		-1.3975
	-7.172		-0.5
	-6.15533		-0.53
	-6.934
	-1.53
	-5.79667

## Sheet: Figure 4-S2C
	sAHP
	NAIVE	EXT	Ext-Saline	Ext-IGF-1	Ext-NVP+IGF-1
	-1.19222	-0.6764	-0.448	-0.563	-0.545667
	-1.08375	-0.718	-0.5025	-0.352	-0.1625
	-0.9	-3.855	-2.1375	-0.0342857	-0.045175
	-1.18714	-0.612	-0.882857	-0.838182	-1.07667
	-2.22933	-0.226667	-0.8625	-0.588	-1.5325
	-1.91933	-1.966	-1.2575	-0.56	-3.88
	-4.18133		-0.86875		-0.915
	-3.48467		-0.65		-0.78
	-2.878		-1.50615		-1.06833
	-0.880667		-1.71702		-1.93
	-6.482		-1.64923		-0.904167
	-3.17333
