# Supplementary material for: IGF-1 facilitates extinction of conditioned fear
Source: eLife. 2021 Apr 1;10:e67267. doi: 10.7554/eLife.67267 (PMC8043742; doi:10.7554/eLife.67267)
Supplement: Figure 4—source data 1. — IGF-1 facilitates the extinction memory by reducing mIAHP and sIAHP. [file elife-67267-fig4-data1.xlsx]

## Sheet: Figure 4B
		Habituation
		Ext-Saline		Ext-IGF-1		Ext-NVP + IGF-1
	Session	Mean	SEM	Mean	SEM	Mean	SEM
	1	0.363636	0.248041	0.658974	0.182767	2.97436	2.29161
	2	3.24242	1.77017	0.102564	0.0284462	1.87179	1.13259
	3	2.0303	1.34198	1.35128	0.374778	4.74359	2.7624
	4	0.636364	0.432177	2.00769	0.556834	0.153846	0.0800641
	5	1.0303	0.629982	4.84615	1.34408	2.28205	1.02882
	6	3.36364	1.6456	3.17949	0.881831	3.87179	1.78157
		Conditioning
		Ext-Saline		Ext-IGF-1		Ext-NVP + IGF-1
	Session	Mean	SEM	Mean	SEM	Mean	SEM
	1	4.78788	2.50828	0.984615	0.879464	0.583333	0.328564
	2	69.0303	5.15682	55.1103	6.23764	59.6389	5.50015
	3	88.9733	2.82004	78.7795	5.55697	80.8611	4.31298
		Extinction
		Ext-Saline		Ext-IGF-1		Ext-NVP + IGF-1
	Session	Mean	SEM	Mean	SEM	Mean	SEM
	1	66.3939	7.90165	64.8714	6.01335	71.5385	4.80183
	2	84.8485	6.76001	73.0381	8.24807	83.6154	5.39067
	3	90.3939	3.25633	82.6	7.4243	82.5952	6.81342
	4	81.9697	6.9953	77.819	7.50026	87.0238	3.88894
	5	70	10.5518	74.4	8.65071	86.2381	5.46891
	6	81.8788	6.39843	70.581	9.12614	87.9048	3.78504
	7	62.1515	8.48092	64.5929	9.36796	77.7143	7.09527
	8	49.7576	10.2403	68.6024	7.63043	82.881	3.47336
	9	56.2424	10.6173	44.6333	10.9439	72.4286	7.88814
	10	63	10.4193	46.4429	9.63036	75.1905	7.33772
	11	57.2121	10.2929	51.8286	9.32287	63.381	9.70322
	12	57.5455	11.689	39.0571	9.05627	67.0952	7.63134
	13	60.2121	9.88686	39.9024	10.6247	66.6905	9.3808
	14	73.5152	9.80521	37.8167	8.6877	65.381	9.18736
	15	56.5152	11.8928	26.1762	8.13106	63.9524	9.8605
	16	45.0606	11.9555	27.9524	9.73438	59.9524	8.47361
	17	52.0303	8.57156	29.1429	8.33697	52.6667	9.40929
	18	58.5152	9.00733	35.0952	10.1187	49.3333	11.1601
	19	42.6061	12.3255	21.7667	6.24163	61.3095	8.8634
	20	27.7573	10.9819	13.8786	5.33309	62.9048	9.97668
		Test
		Ext-Saline		Ext-IGF-1		Ext-NVP + IGF-1
	Session	Mean	SEM	Mean	SEM	Mean	SEM
	1	60.9361	10.657	35.02	8.73292	63.7857	7.39729
	2	61.8333	8.81893	44.8711	9.88466	69.2619	8.97842
	3	59.3889	9.92224	41.9756	7.78125	73.5714	7.79119
	4	50.0278	10.8557	22.4289	6.08251	59.0952	7.30969
	5	50.7576	10.0314	15.2533	4.27353	59.0952	9.50833

## Sheet: Figure 4D
	mIAHP
	Ext-Saline	Ext-IGF-1	Ext-NVP+IGF-1
	65.994	15.3164	43.3184
	189.947	19.5647	110.183
	74.2137	21.0651	47.785
	176.918	14.0879	98.929
	98.7793	91.6192	120.513
	88.9339	55.123	128.083
	114.773	25.3334	69.0359
	76.8433		188.376
	70.3851		260.598
	65.6672
	58.7812

## Sheet: Figure 4E
	sIAHP
	Ext-Saline	Ext-IGF-1	Ext-NVP+IGF-1
	35737.1	2443.84	21839
	73517.3	5273.78	69926.2
	25965.6	4965.67	32636.8
	59805	4409.21	44206.7
	36976.7	46151.6	78169.2
	47127.8	30177.5	77129.9
	35950.5	18042.3	45199.6
	25376.9		53516.6
	22330.3		79773.9
	22296.2
	33043.9

## Sheet: Figure 4F
	% freezing to test	mIAHP		% freezing to test	sIAHP
	6.66	40.23		6.66	24109.9
	34	91.62		34	46151.6
	0	17.44		0	3858.8
	0	17.56		0	4687.4
	67	126.77		67	48756.2
	54	89.94		54	33552.4
	42	62.22		42	27670
	85	93.32		85	41838.9
	88	94.3525		88	56234.7
	91	161.326		91	70267

## Sheet: Figure 4G
	Current inyection	Ext-Saline		Ext-IGF-1		Ext-NVP + IGF-1
	pA	Mean	SEM	Mean	SEM	Mean	SEM
	25	0	0	0.317143	0.119869	0	0
	50	0.56	0.527046	1.27	0.480015	0.18	0.18
	75	1.25	0.625	2.59714	0.981628	1.48	0.68
	100	2.78	0.943269	4.63857	1.75322	2.42	0.91
	125	5	1.21835	6.56857	2.48269	4.17	1.18
	150	7.09	1.28291	8.28714	3.13225	4.73	1.13
	175	8.2	1.62245	11.0414	4.17327	5.17	1.43
	200	9.04	1.65634	12.2586	4.6333	5.45	1.51
	225	9.28	1.87995	14.114	5.33459	6.91	1.6
	250	9.65	1.85189	16.576	6.26514	7.85	0.88
	275	11.26	2.3532	17.798	6.72701	8.5	0.79
	300	10.73	2.09529	20.78	7.8541	8.82	0.74
