# Supplementary material for: IGF-1 facilitates extinction of conditioned fear
Source: eLife. 2021 Apr 1;10:e67267. doi: 10.7554/eLife.67267 (PMC8043742; doi:10.7554/eLife.67267)
Supplement: Figure 5—source data 1. [file elife-67267-fig5-data1.xlsx]

## Sheet: Figure 5B
	mEPSC
	Ext-Saline	Ext-IGF-1	Ext-NVP+IGF-1
	2.37	0.116	1.753
	1.29	0.1	1.56
	1.53	0.606	1.56
	1.4	0.33	1.42
	1.55	1.84	1.74
		1.2	1.346

## Sheet: Figure 5D
	mEPSC
	Ext-Saline	Ext-IGF-1	Ext-NVP+IGF-1
	7.41	7.79	7.614
	9.46	8.57	7.708
	7.76	8.97	9.543
	7.9	7.35	8.811
	9.91	7.82	8
		8.4	8.576
